# Supplementary material for: Psychometric characteristics of ADHD-T-5 in its Dari version among public primary school students in Kabul City, Afghanistan
Source: bioRxiv or medRxiv preprint supplement (doi:10.1101/2024.07.09.24309985), 2024-07-10
Supplement: Supplementary file [file media-1.pdf]

**S1 Table. The scores of 8 experts on 9 items of Inattention domain of ADHD-T-Dari:**

**CVI.**

| Item       | Experts |   |   |   |   |   |   |   | Experts in agreement | I-CVI | Pc    | κ     | Evaluation |
|------------|---------|---|---|---|---|---|---|---|----------------------|-------|-------|-------|------------|
|            | A       | B | C | D | E | F | G | H |                      |       |       |       |            |
| <b>Q01</b> | 1       | 1 | 1 | 1 | 1 | 1 | 0 | 1 | 7                    | 0.875 | 0.031 | 0.871 | Excellent  |
| <b>Q02</b> | 1       | 1 | 1 | 1 | 1 | 1 | 1 | 1 | 8                    | 1.0   | 0.004 | 1.0   | Excellent  |
| <b>Q03</b> | 1       | 1 | 0 | 1 | 1 | 1 | 1 | 1 | 7                    | 0.875 | 0.031 | 0.871 | Excellent  |
| <b>Q04</b> | 1       | 1 | 1 | 1 | 1 | 1 | 1 | 1 | 8                    | 1.0   | 0.004 | 1.0   | Excellent  |
| <b>Q05</b> | 1       | 1 | 1 | 0 | 1 | 1 | 1 | 1 | 7                    | 0.875 | 0.031 | 0.871 | Excellent  |
| <b>Q06</b> | 1       | 1 | 1 | 1 | 1 | 1 | 1 | 1 | 8                    | 1.0   | 0.004 | 1.0   | Excellent  |
| <b>Q07</b> | 1       | 1 | 1 | 0 | 1 | 1 | 1 | 1 | 7                    | 0.875 | 0.031 | 0.871 | Excellent  |
| <b>Q08</b> | 1       | 1 | 1 | 1 | 1 | 1 | 1 | 1 | 8                    | 1.0   | 0.004 | 1.0   | Excellent  |
| <b>Q09</b> | 1       | 1 | 1 | 1 | 1 | 1 | 1 | 1 | 8                    | 1.0   | 0.004 | 1.0   | Excellent  |

S-CVI/Ave = 0.944

Note. The item content validity index (I-CVI) is calculated as follows: positive agreements / total experts. Scale content validity index (S-CVI/Ave) is the average of the CVIs divided by the total number of instrument items. The binomial random variable was used to determine Pc (probability of a chance occurrence):  $Pc = [N! / A! (N-A)!] \times 0.5^N$ . "N" stands for "number of experts" and "A" stands for "number of experts on good relevance". Agreement on significance is indicated by the symbol kappa:  $kappa = (I-CVI - Pc) / (1 - Pc)$ . Fair =  $k = 0.40$  to  $0.59$ ; Good =  $k = 0.60$  to  $0.74$ ; and Excellent =  $k > 0.74$  are the kappa evaluation standards.
