# Supplementary material for: Psychometric characteristics of ADHD-T-5 in its Dari version among public primary school students in Kabul City, Afghanistan
Source: bioRxiv or medRxiv preprint supplement (doi:10.1101/2024.07.09.24309985), 2024-07-10
Supplement: Supplementary file [file media-2.pdf]

**S2 Table. The scores of 8 experts on 9 items of hyperactivity/Impulsivity domain of ADHD-T-Dari: CVI.**

| Item       | Experts |   |   |   |   |   |   |   | Experts in agreement | I-CVI | Pc    | κ     | Evaluation |
|------------|---------|---|---|---|---|---|---|---|----------------------|-------|-------|-------|------------|
|            | A       | B | C | D | E | F | G | H |                      |       |       |       |            |
| <b>Q01</b> | 1       | 1 | 1 | 1 | 1 | 1 | 1 | 1 | 8                    | 1.0   | 0.004 | 1.0   | Excellent  |
| <b>Q02</b> | 1       | 1 | 1 | 1 | 1 | 0 | 1 | 1 | 7                    | 0.875 | 0.031 | 0.871 | Excellent  |
| <b>Q03</b> | 1       | 1 | 0 | 1 | 1 | 1 | 1 | 1 | 7                    | 0.875 | 0.031 | 0.871 | Excellent  |
| <b>Q04</b> | 1       | 1 | 1 | 1 | 1 | 1 | 1 | 1 | 8                    | 1.0   | 0.004 | 1.0   | Excellent  |
| <b>Q05</b> | 1       | 1 | 1 | 1 | 0 | 1 | 1 | 1 | 7                    | 0.875 | 0.031 | 0.871 | Excellent  |
| <b>Q06</b> | 1       | 1 | 1 | 1 | 1 | 1 | 1 | 1 | 8                    | 1.0   | 0.004 | 1.0   | Excellent  |
| <b>Q07</b> | 1       | 1 | 1 | 1 | 1 | 1 | 1 | 1 | 8                    | 1.0   | 0.004 | 1.0   | Excellent  |
| <b>Q08</b> | 1       | 1 | 1 | 1 | 1 | 1 | 1 | 1 | 8                    | 1.0   | 0.004 | 1.0   | Excellent  |
| <b>Q09</b> | 1       | 1 | 1 | 1 | 1 | 1 | 1 | 1 | 8                    | 1.0   | 0.004 | 1.0   | Excellent  |

S-CVI/Ave = 0.958

Note. The item content validity index (I-CVI) is calculated as follows: positive agreements / total experts. Scale content validity index (S-CVI/Ave) is the average of the CVIs divided by the total number of instrument items. The binomial random variable was used to determine Pc (probability of a chance occurrence):  $Pc = \frac{[N!/A! (N-A)!]}{0.5^N}$ . "N" stands for "number of experts" and "A" stands for "number of experts on good relevance".  $I-CVI - Pc / (1 - Pc) = k = \text{kappa}$  denoting agreement on importance. The following values for kappa are considered fair: 0.40 to 0.59; good: of 0.60 to 0.74; and excellent: > 0.74.
