# Supplementary material for: Psychometric characteristics of ADHD-T-5 in its Dari version among public primary school students in Kabul City, Afghanistan
Source: bioRxiv or medRxiv preprint supplement (doi:10.1101/2024.07.09.24309985), 2024-07-10
Supplement: Supplementary file [file media-3.pdf]

**S3 Table. The scores of 40 teachers on 9 items of Inattention domain of ADHD-T-Dari:****FVI.**

| Item       | Number of teacher votes |       | I-FVI | Pc          | κ     | Comprehension |
|------------|-------------------------|-------|-------|-------------|-------|---------------|
|            | Unclear                 | Clear |       |             |       |               |
| <b>Q01</b> | 1                       | 39    | 0.975 | 3.63798E-11 | 0.975 | excellent     |
| <b>Q02</b> | 0                       | 40    | 1.0   | 9.09495E-13 | 1.0   | excellent     |
| <b>Q03</b> | 0                       | 40    | 1.0   | 9.09495E-13 | 1.0   | excellent     |
| <b>Q04</b> | 0                       | 40    | 1.0   | 9.09495E-13 | 1.0   | excellent     |
| <b>Q05</b> | 0                       | 40    | 1.0   | 9.09495E-13 | 1.0   | excellent     |
| <b>Q06</b> | 0                       | 40    | 1.0   | 9.09495E-13 | 1.0   | excellent     |
| <b>Q07</b> | 0                       | 40    | 1.0   | 9.09495E-13 | 1.0   | excellent     |
| <b>Q08</b> | 1                       | 39    | 0.975 | 3.63798E-11 | 0.975 | excellent     |
| <b>Q09</b> | 0                       | 40    | 1.0   | 9.09495E-13 | 1.0   | excellent     |

---

S-FCVI/Ave = 0.994

---

Note. The I-FVI (item face validity index) is calculated as follows: clear votes / total experts. Average of FVIs / total number of instrument items is the S-FVI. The binomial random variable was used to determine Pc (probability of a chance occurrence):  $Pc = [N!/A! (N-A)!] \times 0.5^N$ . "N" stands for "number of experts", while "A" stands for "number of experts on good relevance". k stands for agreement on significance.  $k = (I-FVI - Pc) / (Pc - 1)$ . Kappa is measured using the following criteria: Fair = 80; Medium = 0.80-0.85; and Excellent = 0.85.
