# Supplementary material for: Psychometric characteristics of ADHD-T-5 in its Dari version among public primary school students in Kabul City, Afghanistan
Source: bioRxiv or medRxiv preprint supplement (doi:10.1101/2024.07.09.24309985), 2024-07-10
Supplement: Supplementary file [file media-4.pdf]

**S4 Table. The scores of 40 teachers on 9 items of hyperactivity/Impulsivity domain of ADHD-T-Dari: FVI.**

| Item       | Number of teacher votes |       | I-FVI | Pc          | κ     | Comprehension |
|------------|-------------------------|-------|-------|-------------|-------|---------------|
|            | Unclear                 | Clear |       |             |       |               |
| <b>Q01</b> | 0                       | 40    | 1     | 9.09495E-13 | 1     | excellent     |
| <b>Q02</b> | 0                       | 40    | 1     | 9.09495E-13 | 1     | excellent     |
| <b>Q03</b> | 0                       | 40    | 1     | 9.09495E-13 | 1     | excellent     |
| <b>Q04</b> | 0                       | 40    | 1     | 9.09495E-13 | 1     | excellent     |
| <b>Q05</b> | 2                       | 38    | 0.95  | 2.83762E-09 | 0.95  | excellent     |
| <b>Q06</b> | 0                       | 40    | 1     | 9.09495E-13 | 1     | excellent     |
| <b>Q07</b> | 0                       | 40    | 1     | 9.09495E-13 | 1     | excellent     |
| <b>Q08</b> | 0                       | 40    | 1     | 9.09495E-13 | 1     | excellent     |
| <b>Q09</b> | 3                       | 37    | 0.925 | 3.23489E-07 | 0.925 | excellent     |

S-FCVI/Ave = 0.986

Note. The FVI is equal to the sum of expert votes. Average of FVIs / total number of instrument items is the S-FVI. The binomial random variable was used to determine Pc (probability of a chance occurrence):  $Pc = \frac{[N! / A! (N-A)!] \times 0.5^N}{2^N}$ . "N" stands for "number of experts", while "A" stands for "number of experts on good relevance".  $I-FVI-Pc/(1-Pc) = \kappa$  denoting agreement on importance. Kappa is measured using the following criteria: Fair = 0.80; Medium = 0.80 to 0.85; and Excellent = 0.85.
