# Supplementary material for: Psychometric characteristics of ADHD-T-5 in its Dari version among public primary school students in Kabul City, Afghanistan
Source: bioRxiv or medRxiv preprint supplement (doi:10.1101/2024.07.09.24309985), 2024-07-10
Supplement: Supplementary file [file media-5.pdf]

**S5 Table. Principal Component Factor Analysis for ADHD using Varimax Rotation****Factor Loadings.**

| Items                | Factor loading |       | Communality |
|----------------------|----------------|-------|-------------|
|                      | 1              | 2     |             |
| <b>In-1</b>          |                | 0.687 | 0.528       |
| <b>In-2</b>          |                | 0.630 | 0.447       |
| <b>In-3</b>          |                | 0.460 | 0.254       |
| <b>In-4</b>          |                | 0.763 | 0.604       |
| <b>In-5</b>          |                | 0.718 | 0.552       |
| <b>In-6</b>          |                | 0.737 | 0.570       |
| <b>In-7</b>          |                | 0.514 | 0.365       |
| <b>In-8</b>          |                | 0.497 | 0.464       |
| <b>In-9</b>          |                | 0.701 | 0.520       |
| <b>Hp-1</b>          | 0.576          |       | 0.437       |
| <b>Hp-2</b>          | 0.607          |       | 0.419       |
| <b>Hp-3</b>          | 0.663          |       | 0.464       |
| <b>Hp-4</b>          | 0.472          |       | 0.305       |
| <b>Hp-5</b>          | 0.713          |       | 0.525       |
| <b>Hp-6</b>          | 0.725          |       | 0.560       |
| <b>Hp-7</b>          | 0.679          |       | 0.508       |
| <b>Hp-8</b>          | 0.660          |       | 0.486       |
| <b>Hp-9</b>          | 0.594          |       | 0.376       |
| <b>Eigenvalues</b>   | 6.65           | 1.73  |             |
| <b>% Of variance</b> | 36.96          | 9.61  |             |

Note. In = inattention; Hp = hyperactivity.
